# Supplementary material for: Protein profiling of microdomains purified from renal cell carcinoma and normal kidney tissue samples
Source: Royal Society of Chemistry journal article supplement (doi:10.1039/c2mb05372a), 2011-12-13
Supplement: c2mb05372a.pdf [file c2mb05372a.pdf]

FIGURE CAPTIONS

Caption : Suppl. Fig. 1.

Protein profiles (after SDS-PAGE and CBB staining) of whole lysates (WL) and microdomain-enriched fractions (MD) prepared from kidney tissues of three different patients, after nephrectomy. A, ANK (adjacent normal kidney) R, RCC(renal cell carcinoma).

Caption : Suppl. Table 1.

List of proteins identified by LC-ESI-MS/MS in MD fractions from ANK tissue

Caption : Suppl. Table 2. Table 2:

List of proteins identified by LC-ESI-MS/MS in MD fractions from RCC tissue

Patient 1

Patient 2

Patient 3

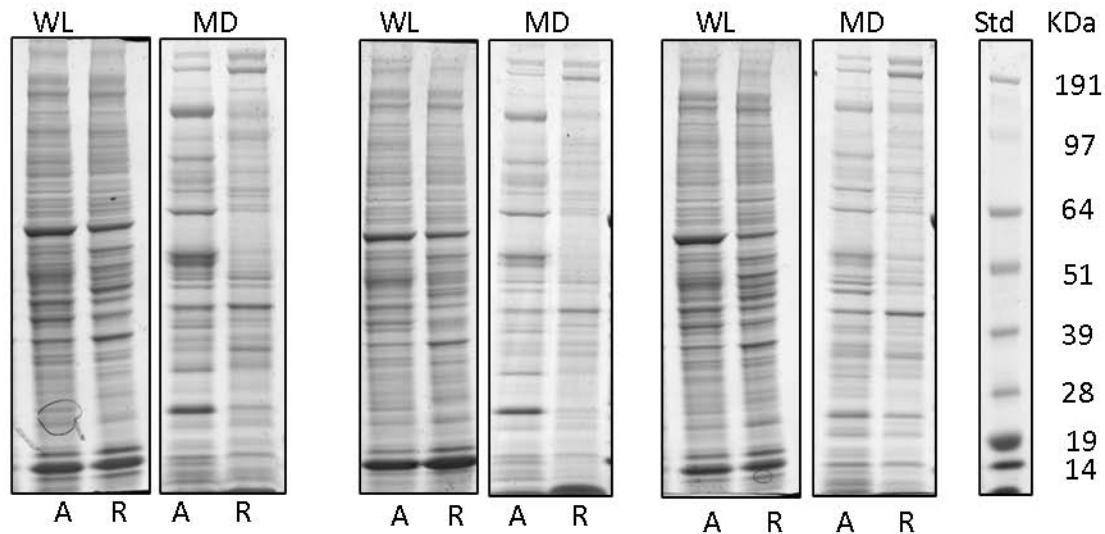

Table S1: Proteins identified by LC-ESI-MS/MS in MD fractions from ANK tissue

| BAND # | NAME                                                               | ACCESSION CODE | MASS (Da) | MASCOT SCORE | COVERAGE (%) | MATCHED PEPTIDES | LOCALIZATION     |
|--------|--------------------------------------------------------------------|----------------|-----------|--------------|--------------|------------------|------------------|
| 1      | Cytochrome c oxidase polypeptide 7A1                               | P24310         | 9169      | 274          | 29           | 3                | MD/MITO          |
| 1      | Cytochrome c oxidase polypeptide 7A2                               | P14406         | 9390      | 42           | 27           | 15               | MD/MITO          |
| 1      | Guanine nucleotide-binding protein G(I)/G(S)/G(O) subunit gamma-12 | Q9UBI6         | 8115      | 116          | 15           | 1                | MD/PM            |
| 2      | Cytochrome b-c1 complex subunit 8                                  | O14949         | 9900      | 53           | 25           | 3                | OTHER(MITO)      |
| 2      | Cytochrome c oxidase polypeptide Vic                               | P09669         | 8776      | 216          | 34           | 13               | MEMBRANE MITO    |
| 2      | Cytochrome c oxidase subunit VIb isoform 1                         | P14854         | 10414     | 39           | 54           | 13               | MEMBRANE MITO    |
| 2      | NADH dehydrogenase [ubiquinone] 1 alpha subcomplex subunit 4       | O00483         | 9421      | 217          | 37           | 8                | MD/MITO          |
| 2      | Sodium/potassium-transporting ATPase gamma chain                   | P54710         | 7336      | 49           | 21           | 2                | MEMBRANE         |
| 3      | Cytochrome c oxidase subunit 7A-related protein                    | O14548         | 12664     | 40           | 11           | 1                | MD/MITO          |
| 4      | Cytochrome c oxidase subunit 5B, mitochondrial                     | P10606         | 13915     | 41           | 18           | 6                | MD/MITO          |
| 5      | Cytochrome b-c1 complex subunit 7                                  | P14927         | 13522     | 55           | 45           | 6                | MD/MITO          |
| 5      | NADH dehydrogenase [ubiquinone] 1 alpha subcomplex subunit 5       | Q16718         | 13507     | 115          | 8            | 1                | MD/MITO          |
| 5      | NADH dehydrogenase [ubiquinone] iron-sulfur protein 5              | O43920         | 12737     | 331          | 35           | 22               | MD/MITO          |
| 6      | NADH dehydrogenase [ubiquinone] 1 alpha subcomplex subunit 6       | P56556         | 15127     | 66           | 32           | 5                | MD/MITO          |
| 6      | NADH dehydrogenase [ubiquinone] 1 alpha subcomplex subunit 7       | O95182         | 12601     | 41           | 30           | 5                | MD/MITO          |
| 6      | NADH dehydrogenase [ubiquinone] 1 beta subcomplex subunit 4        | O95168         | 15256     | 58           | 36           | 7                | MD/MITO          |
| 6      | V-type proton ATPase subunit G 1                                   | O75348         | 13863     | 178          | 25           | 4                | MD/PM            |
| 8      | Cytochrome c oxidase subunit 4 isoform 1                           | P13073         | 19621     | 45           | 34           | 8                | MD/MITO          |
| 8      | Microsomal glutathione S-transferase 3                             | O14880         | 16734     | 46           | 9            | 1                | MEMBRANE         |
| 8      | NADH dehydrogenase [ubiquinone] 1 alpha subcomplex subunit 13      | Q9P0J0         | 16688     | 275          | 38           | 7                | MD/MITO          |
| 10     | NADH dehydrogenase [ubiquinone] 1 alpha subcomplex subunit 12      | Q9UI09         | 17104     | 44           | 14           | 3                | MD/MITO          |
| 10     | RasGAP-activating-like protein 1                                   | O95294         | 90852     | 49           | 2            | 2                | MEMBRANE         |
| 11     | Transcription initiation factor TFIID subunit 4B                   | Q92750         | 91832     | 118          | 14           | 3                | OTHER(CYTOPLASM) |
| 12     | NADH dehydrogenase [ubiquinone] 1 beta subcomplex subunit 8        | O95169         | 21865     | 47           | 11           | 4                | MEMBRANE MITO    |
| 16     | Cytochrome c oxidase subunit 2                                     | P00403         | 25719     | 182          | 7            | 4                | MEMBRANE MITO    |
| 17     | Alpha-crystallin B chain                                           | P02511         | 20146     | 150          | 16           | 3                | OTHER(CYTOPLASM) |
| 17     | Caveolin-1                                                         | Q03135         | 20630     | 52           | 30           | 7                | MD/PM            |
| 17     | NADH dehydrogenase [ubiquinone] 1 beta subcomplex subunit 10       | O96000         | 21048     | 61           | 12           | 3                | MEMBRANE MITO    |
| 19     | Aquaporin-1                                                        | P29972         | 28736     | 42           | 14           | 9                | MD/PM            |
| 19     | Cytochrome b-c1 complex subunit Rieske                             | P47985         | 29934     | 44           | 16           | 12               | MD/MITO          |
| 19     | NADH dehydrogenase [ubiquinone] flavoprotein 2                     | P19404         | 27659     | 97           | 9            | 4                | MD/MITO          |

| BAND # | NAME                                                         | ACCESSION CODE | MASS (Da) | MASCOT SCORE | COVERAGE (%) | MATCHED PEPTIDES | LOCALIZATION      |
|--------|--------------------------------------------------------------|----------------|-----------|--------------|--------------|------------------|-------------------|
| 21     | NADHdehydrogenase[ubiquinone]iron-sulfurprotein3             | O75489         | 30337     | 73           | 2            | 1                | MD/MITO           |
| 24     | Thy-1membranglycoprotein                                     | P04216         | 18151     | 37           | 10           | 3                | MD/PM             |
| 24     | V-typeprotonATPasesubunitD                                   | Q9Y5K8         | 28245     | 65           | 13           | 6                | MD/PM             |
| 24     | V-typeprotonATPasesubunitE1                                  | P36543         | 26186     | 39           | 25           | 6                | MD/PM             |
| 25     | Coiled-coil-helix-coiled-coil-helixdomain-containingprotein3 | Q9NX63         | 26421     | 92           | 14           | 4                | OTHER(MITO)       |
| 25     | Erythrocyteband7integralmembraneprotein                      | P27105         | 31882     | 78           | 15           | 5                | MD/PM             |
| 25     | Tricarboxylatetransportprotein                               | P53007         | 34333     | 65           | 2            | 6                | MEMBRANEMITO      |
| 25     | Voltage-dependentanion-selectivechannelprotein3              | Q9Y277         | 30981     | 67           | 14           | 4                | MD/MITO           |
| 26     | Prohibitin-2                                                 | Q99623         | 33276     | 95           | 1            | 4                | MD/MITO           |
| 26     | Voltage-dependentanion-selectivechannelprotein1              | P21796         | 30868     | 53           | 8            | 4                | MD/MITO           |
| 28     | Guaninenucleotide-bindingproteinG(I)/G(S)/G(T)subunitbeta-1  | P62873         | 38151     | 104          | 11           | 6                | MD/PM             |
| 28     | NADHdehydrogenase[ubiquinone]lalphasubcomplexsubunit9        | Q16795         | 42654     | 116          | 16           | 12               | MD/MITO           |
| 28     | Voltage-dependentanion-selectivechannelprotein2              | P45880         | 32060     | 84           | 4            | 1                | MD/MITO           |
| 29     | NADHdehydrogenase[ubiquinone]lalphasubcomplexsubunit10       | O95299         | 41067     | 46           | 22           | 9                | OTHER(MITO)       |
| 29     | V-typeprotonATPasesubunit1                                   | P61421         | 40759     | 62           | 25           | 18               | MEMBRANE          |
| 30     | Guaninenucleotide-bindingproteinG(i),alpha-2subunit          | P04899         | 40995     | 202          | 5            | 2                | MD/PM             |
| 30     | Hydroxyacidoxidase2                                          | Q9NYQ3         | 39384     | 56           | 21           | 6                | OTHER(PEROXISOME) |
| 30     | Stomatin-likeprotein2                                        | Q9UIZ1         | 38534     | 56           | 2            | 7                | MD/PM             |
| 31     | Actin,cytoplasmic2                                           | P63261         | 42108     | 145          | 34           | 23               | OTHER(CYTOPLASM)  |
| 31     | Erlin-1                                                      | O75477         | 39072     | 557          | 6            | 2                | MD/PM             |
| 31     | V-typeprotonATPasesubunitC1                                  | P21283         | 44085     | 67           | 26           | 12               | MD/PM             |
| 32     | Cytochromeb-c1complexsubunit2                                | P22695         | 48584     | 83           | 35           | 28               | MD/MITO           |
| 32     | Isocitratehydrogenase[NADP]                                  | P48735         | 51333     | 653          | 2            | 2                | OTHER(MITO)       |
| 32     | NADHdehydrogenase[ubiquinone]iron-sulfurprotein2             | O75306         | 52911     | 79           | 24           | 16               | MD/MITO           |
| 33     | Flotillin-2                                                  | Q14254         | 41830     | 107          | 5            | 3                | MD/PM             |
| 33     | Trifunctionalenzymesubunitbeta                               | P55084         | 51547     | 88           | 12           | 5                | OTHER(MITO)       |
| 34     | ATPsynthasesubunitbeta                                       | P06576         | 56525     | 47           | 7            | 3                | MD/MITO           |
| 34     | Cytochromeb-c1complexsubunit1                                | P31930         | 53297     | 379          | 7            | 4                | MD/MITO           |
| 34     | Dipeptidase1                                                 | P16444         | 46101     | 45           | 25           | 13               | MD/PM             |
| 34     | Elongationfactor1-alpha1                                     | P68104         | 50451     | 95           | 4            | 2                | OTHER(CYTOPLASM)  |
| 34     | Flotillin-1                                                  | O75955         | 47554     | 135          | 9            | 3                | MD/PM             |
| 34     | NADHdehydrogenase[ubiquinone]flavoprotein1                   | P49821         | 51469     | 122          | 33           | 27               | MD/MITO           |
| 35     | Dihydrolipoyldehydrogenase                                   | P09622         | 54713     | 45           | 15           | 7                | OTHER(MITO)       |
| 35     | Ectonucleotidepyrophosphatasefamilymember6                   | Q6UWR7         | 50241     | 202          | 2            | 1                | MEMBRANE          |
| 35     | Vacuolarproteinorting-associatedprotein4A                    | Q9UN37         | 49152     | 33           | 4            | 2                | MEMBRANE          |

| BAND # | NAME                                              | ACCESSION CODE | MASS (Da) | MASCOT SCORE | COVERAGE (%) | MATCHED PEPTIDES | LOCALIZATION |
|--------|---------------------------------------------------|----------------|-----------|--------------|--------------|------------------|--------------|
| 35     | V-typeprotonATPasesubunitH                        | Q9UII2         | 56417     | 66           | 30           | 12               | MD/PM        |
| 36     | ATPsynthasesubunitalpha                           | P25705         | 59828     | 54           | 17           | 9                | MD/MITO      |
| 36     | Basigin                                           | P35613         | 42573     | 52           | 3            | 1                | MD/PM        |
| 36     | UDP-glucuronosyltransferase2B7                    | P16662         | 61168     | 82           | 5            | 3                | MEMBRANE     |
| 36     | V-typeprotonATPasesubunitB                        | P15313         | 57196     | 86           | 13           | 7                | MD/PM        |
| 37     | V-typeprotonATPasesubunitB                        | P21281         | 56807     | 54           | 8            | 3                | MD/PM        |
| 39     | Dyneinheavychain7                                 | Q8WXX0         | 461142    | 90           | 0            | 2                | CYTOSKELETON |
| 39     | Sodium/glucosecotransporter2                      | P31639         | 73932     | 46           | 4            | 1                | MEMBRANE     |
| 40     | ATP-bindingcassettesub-familyDmember3             | Q99758         | 75941     | 42           | 4            | 2                | MEMBRANE     |
| 40     | Iodotyrosinedehalogenase1                         | Q6PHW0         | 33510     | 60           | 2            | 1                | MEMBRANE     |
| 40     | Verylong-chainspecificacyl-CoAdehydrogenase       | P49748         | 70745     | 57           | 7            | 7                | OTHER(MITO)  |
| 42     | Calcium-bindingmitochondrialcarrierproteinAralar2 | Q9UJS0         | 74528     | 51           | 21           | 15               | OTHER(MITO)  |
| 42     | Sodium-coupledmonocarboxylatetransporter2         | Q1EHB4         | 68629     | 40           | 2            | 1                | MEMBRANE     |
| 42     | V-typeprotonATPasecatalyticsubunitA               | P38606         | 68660     | 88           | 21           | 21               | MD/PM        |
| 43     | Alkalinephosphatase,tissue-nonspecificisozyme     | P05186         | 57611     | 41           | 5            | 4                | MD/PM        |
| 43     | NADH-ubiquinoneoxidoreductase75kDasubunit         | P28331         | 80443     | 113          | 35           | 6                | MD/MITO      |
| 45     | Mitochondrialinnermembraneprotein                 | Q16891         | 84026     | 224          | 5            | 4                | OTHER(MITO)  |
| 45     | V-typeprotonATPase116kDasubunitaisoform1          | Q93050         | 97148     | 57           | 3            | 3                | MD/PM        |
| 45     | Xaa-Proaminopeptidase2                            | O43895         | 76090     | 46           | 6            | 6                | MEMBRANE     |
| 46     | Sodium/potassium-transportingATPasesubunitalpha-1 | P05023         | 114135    | 40           | 23           | 39               | MEMBRANE     |
| 46     | Uromodulin                                        | P07911         | 72451     | 76           | 7            | 3                | MD/PM        |
| 47     | Desmoplakin                                       | P15924         | 334021    | 45           | 1            | 4                | CYTOSKELETON |
| 47     | Potassium-transportingATPasealphachain1           | P20648         | 115756    | 107          | 26           | 19               | MEMBRANE     |
| 48     | Angiotensin-convertingenzyme                      | Q9BYF1         | 92860     | 38           | 1            | 1                | MEMBRANE     |
| 48     | Dipeptidylpeptidase                               | P27487         | 88907     | 78           | 10           | 12               | MD/PM        |
| 48     | NAD(P)transhydrogenase,mitochondrial              | Q13423         | 114564    | 60           | 5            | 7                | OTHER(MITO)  |
| 49     | GTP-bindingprotein2                               | Q9BX10         | 66468     | 45           | 1            | 1                | MD/PM        |
| 51     | AminopeptidaseN                                   | P15144         | 109870    | 103          | 9            | 10               | MD/PM        |
| 51     | Myosin-VI                                         | Q9UM54         | 150965    | 91           | 3            | 3                | OTHER(GOLGI) |
| 54     | Myosin-9                                          | P35579         | 227646    | 105          | 7            | 16               | CYTOSKELETON |
| 56     | Maltase-glucoamylase                              | O43451         | 211031    | 147          | 1            | 2                | MD/PM        |
| 57     | Cubilin                                           | O60494         | 407195    | 45           | 4            | 17               | MD/PM        |

Table S2: Proteins identified by LC-ESI-MS/MS in MD fractions from RCC tissue

| BAND # | NAME                                                            | ACCESSION CODE | MASS (Da) | MASCOT SCORE | COVERAGE (%) | MATCHED PEPTIDES | LOCALIZATION     |
|--------|-----------------------------------------------------------------|----------------|-----------|--------------|--------------|------------------|------------------|
| 1      | Neutrophil defensin 1                                           | P59665         | 10536     | 44           | 19           | 3                | OTHER(SECRETED)  |
| 2      | Cytochrome c oxidase polypeptide 7A1, mitochondrial             | P24310         | 9169      | 50           | 16           | 2                | MD/MITO          |
| 2      | Cytochrome c oxidase polypeptide 7A2, mitochondrial             | P14406         | 9390      | 86           | 27           | 4                | MD/MITO          |
| 3      | Cytochrome c oxidase polypeptide VIc                            | P09669         | 8776      | 66           | 32           | 6                | MD/MITO          |
| 3      | Cytochrome c oxidase subunit VIb isoform 1                      | P14854         | 10414     | 49           | 24           | 3                | MD/MITO          |
| 3      | Protein S100-A8                                                 | P05109         | 10885     | 41           | 11           | 1                | MEMBRANE         |
| 4      | Cytochrome c oxidase subunit 5A, mitochondrial                  | P20674         | 16923     | 41           | 16           | 3                | MD/MITO          |
| 4      | Cytochrome c oxidase subunit 5B, mitochondrial                  | P10606         | 13915     | 45           | 18           | 4                | MD/MITO          |
| 5      | NADH dehydrogenase [ubiquinone] 1 alpha subcomplex subunit 5    | Q16718         | 13507     | 84           | 8            | 1                | MD/MITO          |
| 7      | CD59 glycoprotein                                               | P13987         | 14795     | 44           | 6            | 1                | MD/PM            |
| 8      | Cytochrome c oxidase subunit 4 isoform 1                        | P13073         | 19621     | 100          | 30           | 11               | MD/MITO          |
| 8      | Hemoglobin subunit beta                                         | P68871         | 16102     | 71           | 21           | 3                | OTHER(CYTOPLASM) |
| 8      | NADH dehydrogenase [ubiquinone] 1 alpha subcomplex subunit 13   | Q9P0J0         | 16688     | 44           | 20           | 4                | MD/MITO          |
| 9      | Microsomal glutathione S-transferase 3                          | O14880         | 16734     | 90           | 9            | 2                | MEMBRANE         |
| 9      | Protein MAL2                                                    | Q969L2         | 19341     | 35           | 6            | 1                | MD/PM            |
| 10     | Transcription initiation factor TFIID subunit 4B                | Q92750         | 91832     | 71           | 4            | 4                | OTHER(CYTOPLASM) |
| 16     | Cytochrome c oxidase subunit 2                                  | P00403         | 25719     | 60           | 4            | 2                | MD/MITO          |
| 17     | Alpha-crystallin B chain                                        | P02511         | 20146     | 99           | 20           | 6                | OTHER(CYTOPLASM) |
| 17     | Caveolin-1                                                      | Q03135         | 20630     | 107          | 30           | 7                | MD/PM            |
| 17     | Ras-related protein Rab-1B                                      | Q9H0U4         | 22171     | 67           | 19           | 4                | MD/PM            |
| 18     | NADH dehydrogenase [ubiquinone] flavoprotein 2                  | P19404         | 27659     | 115          | 14           | 6                | MD/MITO          |
| 19     | Aquaporin-1                                                     | P29972         | 28736     | 121          | 13           | 5                | MD/PM            |
| 19     | Cytochrome b-c1 complex subunit Rieske                          | P47985         | 29934     | 92           | 16           | 10               | MD/MITO          |
| 20     | Actin 1                                                         | P63267         | 42052     | 48           | 30           | 30               | CYTOSKELETON     |
| 21     | NADH dehydrogenase [ubiquinone] iron-sulfur protein 3           | O75489         | 30337     | 66           | 9            | 3                | MEMBRANE MITO    |
| 22     | Coiled-coil-helix-coiled-coil-helix domain-containing protein 3 | Q9NX63         | 26421     | 41           | 8            | 4                | OTHER(MITO)      |
| 24     | Prohibitin                                                      | P35232         | 29843     | 88           | 19           | 5                | MD/MITO          |
| 24     | Thy-1 membrane glycoprotein                                     | P04216         | 18151     | 46           | 14           | 2                | MD/PM            |
| 25     | Putative uncharacterized protein LOC439951                      | Q8NDZ9         | 22292     | 44           | 6            | 1                | OTHER(UNKNOWN)   |
| 25     | Voltage-dependent anion-selective channel protein 3             | Q9Y277         | 30981     | 45           | 10           | 3                | MD/MITO          |

| BAND # | NAME                                                              | ACCESSION CODE | MASS (Da) | MASCOT SCORE | COVERAGE (%) | MATCHED PEPTIDES | LOCALIZATION     |
|--------|-------------------------------------------------------------------|----------------|-----------|--------------|--------------|------------------|------------------|
| 26     | Voltage-dependent anion-selective channel protein 1               | P21796         | 30868     | 66           | 19           | 6                | MD/MITO          |
| 27     | Prohibitin-2                                                      | Q99623         | 33276     | 87           | 11           | 4                | MD/MITO          |
| 28     | 60S acidic ribosomal protein P0-like                              | Q8NHW5         | 34364     | 52           | 3            | 1                | OTHER(CYTOPLASM) |
| 28     | Guanine nucleotide-binding protein G(I)/G(S)/G(T) subunit beta-1  | P62873         | 38151     | 108          | 27           | 9                | MD/PM            |
| 28     | Guanine nucleotide-binding protein G(I)/G(S)/G(T) subunit beta-2  | P62879         | 38048     | 90           | 23           | 12               | MD/PM            |
| 28     | Voltage-dependent anion-selective channel protein 2               | P45880         | 32060     | 51           | 18           | 5                | MD/MITO          |
| 29     | Glyceraldehyde-3-phosphate dehydrogenase                          | P04406         | 36201     | 42           | 10           | 4                | MD/PM            |
| 30     | Guanine nucleotide-binding protein G(i), alpha-2 subunit          | P04899         | 40995     | 108          | 21           | 8                | MD/PM            |
| 30     | V-type proton ATPase subunit d 1                                  | P61421         | 40329     |              | 11           | 3                | MD/PM            |
| 31     | Erlin-2                                                           | Q94905         | 38044     | 155          | 17           | 8                | MD/PM            |
| 32     | Cytochrome b-c1 complex subunit 2                                 | P22695         | 48584     | 109          | 23           | 9                | MD/MITO          |
| 32     | NADH dehydrogenase [ubiquinone] iron-sulfur protein 2             | O75306         | 52911     | 47           | 5            | 2                | MD/MITO          |
| 34     | Cytochrome b-c1 complex subunit 1                                 | P31930         | 52645     | 71           | 4            | 2                | MD/MITO          |
| 34     | Flotillin-1                                                       | O75955         | 47554     | 341          | 27           | 13               | MD/PM            |
| 34     | Flotillin-2                                                       | Q14254         | 41830     | 428          | 37           | 18               | MD/PM            |
| 34     | NADH dehydrogenase [ubiquinone] flavoprotein 1, mitochondrial     | P49821         | 51469     | 95           | 25           | 14               | MD/MITO          |
| 34     | Solute carrier family 2, facilitated glucose transporter member 1 | P11166         | 54083     | 133          | 1            | 1                | MD/PM            |
| 34     | Tubulin alpha-1A chain                                            | Q71U36         | 50788     | 114          | 5            | 2                | CYTOSKELETON     |
| 35     | Basigin                                                           | P35613         | 42573     | 25           | 2            | 1                | MD/PM            |
| 35     | Cell cycle control protein 5                                      | Q9NV96         | 41057     | 31           | 2            | 1                | MEMBRANE         |
| 35     | Dihydrolipoyl dehydrogenase                                       | P09622         | 54713     | 88           | 9            | 5                | OTHER(MITO)      |
| 35     | Ig gamma-1 chain C region                                         | P01857         | 36596     | 49           | 7            | 2                | OTHER(CYTOPLASM) |
| 35     | Monocyte differentiation antigen CD                               | P08571         | 40678     | 26           | 2            | 1                | MEMBRANE         |
| 35     | Sorting and assembly machinery component 50                       | Q9Y512         | 52342     | 53           | 12           | 7                | MEMBRANE MITO    |
| 35     | Tubulin beta-2C chain                                             | P68371         | 50255     | 44           | 11           | 5                | CSK              |
| 36     | 14-3-3 protein gamma                                              | P61981         | 28456     | 75           | 27           | 12               | OTHER(CYTOPLASM) |
| 36     | ATP synthase subunit alpha                                        | P25705         | 59828     | 256          | 18           | 9                | MEMBRANE MITO    |
| 36     | HLA class II histocompatibility antigen                           | Q5Y7A7         | 30331     | 105          | 15           | 4                | MEMBRANE         |
| 36     | Metaxin-2                                                         | O75431         | 30086     | 60           | 11           | 3                | MEMBRANE MITO    |
| 36     | Protein ERGIC-53                                                  | P49257         | 57798     | 51           | 6            | 4                | MEMBRANE         |
| 36     | Tyrosine-protein kinase Lyn                                       | P07948         | 58993     | 102          | 8            | 4                | MEMBRANE         |
| 36     | Vimentin                                                          | P08670         | 53676     | 153          | 4            | 2                | CYTOSKELETON     |
| 36     | V-type proton ATPase subunit B                                    | P15313         | 57196     | 83           | 9            | 5                | MD/PM            |
| 37     | Myeloperoxidase                                                   | P05164         | 84784     | 100          | 7            | 5                | OTHER(LYSOME)    |
| 38     | Pyruvate kinase isozymes R/L                                      | P30613         | 62191     | 75           | 4            | 2                | OTHER(CYTOPLASM) |

| BAND # | NAME                                                      | ACCESSION CODE | MASS (Da) | MASCOT SCORE | COVERAGE (%) | MATCHED PEPTIDES | LOCALIZATION     |
|--------|-----------------------------------------------------------|----------------|-----------|--------------|--------------|------------------|------------------|
| 38     | Radixin                                                   | P35241         | 68635     | 57           | 12           | 13               | MD/PM            |
| 39     | Ezrin                                                     | P15311         | 69484     | 83           | 7            | 6                | MD/PM            |
| 41     | Serum albumin                                             | P02768         | 71317     | 340          | 8            | 7                | OTHER(SECRETED)  |
| 41     | V-type proton ATPase catalytic subunit A                  | P38606         | 68660     | 60           | 14           | 12               | MD/PM            |
| 42     | Calcium-binding mitochondrial carrier protein Aralar1     | O75746         | 75114     | 114          | 11           | 10               | MEMBRANE MITO    |
| 42     | Calcium-binding mitochondrial carrier protein Aralar2     | Q9UJS0         | 74528     | 233          |              |                  | MEMBRANE MITO    |
| 44     | Moesin                                                    | P26038         | 67892     | 65           | 13           | 9                | MD/PM            |
| 44     | NADH-ubiquinone oxidoreductase 75 kDa subunit             | P28331         | 80443     | 113          | 14           | 8                | MD/MITO          |
| 44     | Platelet glycoprotein 4                                   | P16671         | 53589     | 84           | 8            | 6                | MD/PM            |
| 45     | Band 3 anion transport protein                            | P02730         | 102013    | 63           | 2            | 2                | MD/PM            |
| 45     | Mitochondrial inner membrane protein                      | Q16891         | 84026     | 144          | 15           | 17               | MEMBRANE MITO    |
| 45     | V-type proton ATPase 116 kDa subunit a isoform 4          | Q9HBG4         | 97207     | 86           | 5            | 4                | MD/PM            |
| 46     | Sodium/potassium-transporting ATPase subunit alpha-1      | P05023         | 114135    | 43           | 19           | 26               | MEMBRANA         |
| 47     | Catenin alpha-1                                           | P35221         | 100693    | 76           | 6            | 7                | MEMBRANE         |
| 48     | Dipeptidyl peptidase 4                                    | P27487         | 88907     | 41           | 4            | 4                | MD/PM            |
| 50     | Aminopeptidase N                                          | P15144         | 109870    | 147          | 15           | 18               | MD/PM            |
| 50     | Ceruloplasmin                                             | P00450         | 122983    | 79           | 6            | 7                | OTHER(SECRETED)  |
| 50     | Ectonucleotide pyrophosphatase family member 3            | O14638         | 101998    | 51           | 3            | 3                | MEMBRANE         |
| 50     | Multidrug resistance protein 1                            | P08183         | 141772    | 41           | 1            | 2                | MD/PM            |
| 50     | Netrin-G1                                                 | Q9HCJ2         | 72702     | 42           | 2            | 3                | MEMBRANE         |
| 50     | Voltage-dependent calcium channel subunit alpha-2/delta-1 | P54289         | 124246    | 49           | 0            | 1                | MD/PM            |
| 54     | Myosin-10                                                 | P35580         | 229827    | 75           | 5            | 13               | OTHER(CYTOPLASM) |
| 54     | Myosin-11                                                 | P35749         | 228054    | 123          | 3            | 12               | OTHER(CYTOPLASM) |
| 54     | Myosin-14                                                 | Q7Z406         | 228889    | 144          | 2            | 9                | OTHER(CYTOPLASM) |
| 54     | Myosin-9                                                  | P35579         | 227646    | 575          | 20           | 53               | CYTOSKELETON     |
| 55     | Filamin-A                                                 | P21333         | 283301    | 51           | 2            | 4                | CYTOSKELETON     |
| 55     | Spectrin alpha chain, brain                               | Q13813         | 285163    | 61           | 9            | 18               | CYTOSKELETON     |
| 56     | Plectin-1                                                 | Q15149         | 533462    | 44           | 3            | 13               | CYTOSKELETON     |
